# Supplementary material
Source: HighWire-hosted journal article supplement (https://drc.bmj.com/content/10/1/e002492)
Supplement: inline-supplementary-material-1 [file inline-supplementary-material-1.pdf]

**Table S1.** Repeatability of blood flow velocity and flow measurement

| Blood flow velocity | PTA           | FPPDA         | FiCPDA        | SCPDA         | TCPDA         | FoCPDA        |
|---------------------|---------------|---------------|---------------|---------------|---------------|---------------|
| ICC <sub>3,1</sub>  | 0.973         | 0.992         | 0.998         | 0.998         | 0.956         | 0.974         |
| 95% CI              | (0.962-0.986) | (0.989-0.994) | (0.997-0.998) | (0.998-0.999) | (0.941-0.968) | (0.961-0.985) |
| Blood flow          | PTA           | FPPDA         | FiCPDA        | SCPDA         | TCPDA         | FoCPDA        |
| ICC <sub>3,1</sub>  | 0.980         | 0.880         | 0.910         | 0.920         | 0.914         | 0.944         |
| 95% CI              | (0.973-0.985) | (0.842-0.911) | (0.881-0.934) | (0.893-0.941) | (0.897-0.931) | (0.926-0.959) |

ICC<sub>3,1</sub>: intraclass correlation coefficient (3, 1), 95% CI: 95% confidence interval

**Table S2.** Blood flow velocity of blood vessels in different age groups (unit: cm/s)

| Vessels | Age group | Healthy                 |                         | DPN                     |                         |
|---------|-----------|-------------------------|-------------------------|-------------------------|-------------------------|
|         |           | Male                    | Female                  | Male                    | Female                  |
| FPPDA   | 1         | 12.96±4.08 <sup>a</sup> | 15.48±1.67 <sup>a</sup> | 25.22±3.70 <sup>a</sup> | 24.67±4.14 <sup>a</sup> |
|         | 2         | 15.81±4.94 <sup>a</sup> | 14.65±3.96 <sup>a</sup> | 29.73±8.11 <sup>a</sup> | 24.58±3.71 <sup>a</sup> |
|         | 3         | 17.90±4.23 <sup>a</sup> | 18.14±4.69 <sup>a</sup> | 27.64±8.27 <sup>a</sup> | 26.18±5.88 <sup>a</sup> |
| FiCPDA  | 1         | 16.01±5.04 <sup>a</sup> | 17.01±3.06 <sup>a</sup> | 29.21±6.84 <sup>a</sup> | 27.27±4.04 <sup>a</sup> |
|         | 2         | 18.01±3.00 <sup>a</sup> | 17.22±3.97 <sup>a</sup> | 28.97±7.93 <sup>a</sup> | 27.38±5.99 <sup>a</sup> |
|         | 3         | 19.63±4.12 <sup>a</sup> | 19.63±3.35 <sup>a</sup> | 25.43±6.28 <sup>a</sup> | 26.46±4.60 <sup>a</sup> |
| SCPDA   | 1         | 17.81±2.36 <sup>a</sup> | 18.70±2.76 <sup>a</sup> | 27.15±8.51 <sup>a</sup> | 24.12±1.56 <sup>a</sup> |

|        |   |                         |                         |                          |                          |
|--------|---|-------------------------|-------------------------|--------------------------|--------------------------|
|        | 2 | 19.79±2.79 <sup>a</sup> | 19.48±3.84 <sup>a</sup> | 26.28±4.42 <sup>a</sup>  | 27.47±5.22 <sup>a</sup>  |
|        | 3 | 17.49±2.87 <sup>a</sup> | 18.84±4.31 <sup>a</sup> | 24.24±5.57 <sup>a</sup>  | 24.28±5.22 <sup>a</sup>  |
| TCPDA  | 1 | 21.66±4.02 <sup>a</sup> | 21.38±4.33 <sup>a</sup> | 33.13±8.16 <sup>a</sup>  | 28.00±5.08 <sup>a</sup>  |
|        | 2 | 21.54±3.01 <sup>a</sup> | 22.69±4.51 <sup>a</sup> | 34.04±6.68 <sup>a</sup>  | 29.75±3.73 <sup>a</sup>  |
|        | 3 | 24.12±3.82 <sup>a</sup> | 25.07±3.54 <sup>a</sup> | 30.77±7.70 <sup>a</sup>  | 30.72.2325 <sup>a</sup>  |
| FoCPDA | 1 | 19.19±7.31 <sup>a</sup> | 20.42±4.62 <sup>a</sup> | 30.45±4.69 <sup>a</sup>  | 27.69±4.66 <sup>a</sup>  |
|        | 2 | 20.25±4.00 <sup>a</sup> | 19.96±5.82 <sup>a</sup> | 27.64±5.58 <sup>a</sup>  | 25.87±3.18 <sup>a</sup>  |
|        | 3 | 23.69±6.51 <sup>a</sup> | 19.63±4.28 <sup>a</sup> | 31.52±8.38 <sup>a</sup>  | 27.54±7.72 <sup>a</sup>  |
| PTA    | 1 | 30.86±6.61 <sup>a</sup> | 32.16±3.97 <sup>a</sup> | 32.53±3.54 <sup>a</sup>  | 33.27±8.30 <sup>a</sup>  |
|        | 2 | 32.18±7.71 <sup>a</sup> | 29.89±3.98 <sup>a</sup> | 37.09±10.18 <sup>a</sup> | 34.75±5.71 <sup>a</sup>  |
|        | 3 | 35.69±9.76 <sup>a</sup> | 36.03±6.12 <sup>a</sup> | 34.49±12.19 <sup>a</sup> | 41.57±15.39 <sup>a</sup> |

Values are expressed as means ± standard deviation

The multiple comparisons were carried out for the statistical analysis. Three comparisons were made between the three different age groups, and the *P*-values were corrected to 0.05/3=0.0167. Identical letters indicate age groups within a column that there is no significant difference between each other (*P*>0.0167).

**Table S3.** Blood flow of blood vessels in different age groups (unit: ml/min)

| Vessels | Age group | Healthy                |                        | DPN                    |                        |
|---------|-----------|------------------------|------------------------|------------------------|------------------------|
|         |           | Male                   | Female                 | Male                   | Female                 |
| FPPDA   | 1         | 1.20±0.42 <sup>a</sup> | 1.30±0.48 <sup>a</sup> | 2.37±0.67 <sup>a</sup> | 2.13±1.07 <sup>a</sup> |
|         | 2         | 1.20±0.63 <sup>a</sup> | 1.30±0.48 <sup>a</sup> | 2.77±0.82 <sup>a</sup> | 2.53±1.06 <sup>a</sup> |
|         | 3         | 1.40±0.70 <sup>a</sup> | 1.60±0.70 <sup>a</sup> | 2.60±1.39 <sup>a</sup> | 3.17±0.82 <sup>a</sup> |
| FiCPDA  | 1         | 1.50±0.53 <sup>a</sup> | 1.50±0.71 <sup>a</sup> | 2.63±0.76 <sup>a</sup> | 2.60±1.23 <sup>a</sup> |
|         | 2         | 1.30±0.48 <sup>a</sup> | 1.30±0.48 <sup>a</sup> | 2.64±1.11 <sup>a</sup> | 3.03±0.71 <sup>a</sup> |

|        |   |                        |                        |                        |                        |
|--------|---|------------------------|------------------------|------------------------|------------------------|
| SCPDA  | 3 | 1.50±0.71 <sup>a</sup> | 1.80±0.92 <sup>a</sup> | 2.23±0.82 <sup>a</sup> | 2.70±0.73 <sup>a</sup> |
|        | 1 | 1.40±0.70 <sup>a</sup> | 1.30±0.48 <sup>a</sup> | 2.30±0.74 <sup>a</sup> | 2.13±1.07 <sup>a</sup> |
|        | 2 | 1.30±0.48 <sup>a</sup> | 1.30±0.48 <sup>a</sup> | 2.43±1.25 <sup>a</sup> | 2.77±0.63 <sup>a</sup> |
| TCPDA  | 3 | 1.40±0.52 <sup>a</sup> | 1.70±0.67 <sup>a</sup> | 2.67±1.49 <sup>a</sup> | 2.90±1.21 <sup>a</sup> |
|        | 1 | 1.50±0.53 <sup>a</sup> | 1.30±0.67 <sup>a</sup> | 2.53±0.36 <sup>a</sup> | 2.17±0.53 <sup>a</sup> |
|        | 2 | 1.20±0.42 <sup>a</sup> | 1.40±0.70 <sup>a</sup> | 2.63±1.29 <sup>a</sup> | 2.40±0.62 <sup>a</sup> |
| FoCPDA | 3 | 1.80±0.79 <sup>a</sup> | 1.40±0.52 <sup>a</sup> | 2.73±0.89 <sup>a</sup> | 2.17±0.98 <sup>a</sup> |
|        | 1 | 1.30±0.48 <sup>a</sup> | 1.60±0.70 <sup>a</sup> | 3.23±1.34 <sup>a</sup> | 3.47±1.90 <sup>a</sup> |
|        | 2 | 1.30±0.67 <sup>a</sup> | 1.10±0.32 <sup>a</sup> | 2.60±1.36 <sup>a</sup> | 2.94±1.89 <sup>a</sup> |
| PTA    | 3 | 1.50±0.71 <sup>a</sup> | 1.70±0.82 <sup>a</sup> | 2.93±1.77 <sup>a</sup> | 2.97±1.54 <sup>a</sup> |
|        | 1 | 3.80±2.20 <sup>a</sup> | 4.00±2.45 <sup>a</sup> | 3.40±0.98 <sup>a</sup> | 3.10±1.64 <sup>a</sup> |
|        | 2 | 2.80±1.69 <sup>a</sup> | 2.50±1.08 <sup>a</sup> | 4.17±1.94 <sup>a</sup> | 3.40±1.58 <sup>a</sup> |
|        | 3 | 4.30±2.06 <sup>a</sup> | 3.40±1.07 <sup>a</sup> | 4.07±1.61 <sup>a</sup> | 4.67±3.37 <sup>a</sup> |

Values are expressed as means ± standard deviation

The multiple comparisons were carried out for the statistical analysis. Three comparisons were made between the three different age groups, and the *P*-values were corrected to 0.05/3=0.0167. Identical letters indicate age groups within a column that there is no significant difference between each other (*P*>0.0167).

**Table S4.** *P*-values results of blood flow velocity between different genders.

| Vessels | Gender |        | Healthy     |             |             | DPN         |             |             |
|---------|--------|--------|-------------|-------------|-------------|-------------|-------------|-------------|
|         |        |        | Age group 1 | Age group 2 | Age group 3 | Age group 1 | Age group 2 | Age group 3 |
| FPPDA   | Male   | Female | 0.087       | 0.572       | 0.908       | 0.759       | 0.084       | 0.653       |
|         | Female | Male   | 0.087       | 0.572       | 0.908       | 0.759       | 0.084       | 0.653       |
| FiCPDA  | Male   | Female | 0.600       | 0.625       | 0.999       | 0.450       | 0.621       | 0.680       |

|        |        |        |       |       |       |       |       |       |
|--------|--------|--------|-------|-------|-------|-------|-------|-------|
| SCPDA  | Female | Male   | 0.600 | 0.625 | 0.999 | 0.450 | 0.621 | 0.680 |
|        | Male   | Female | 0.449 | 0.838 | 0.420 | 0.283 | 0.589 | 0.988 |
| TCPDA  | Female | Male   | 0.449 | 0.838 | 0.420 | 0.283 | 0.589 | 0.988 |
|        | Male   | Female | 0.883 | 0.512 | 0.569 | 0.109 | 0.094 | 0.988 |
| FoCPDA | Female | Male   | 0.883 | 0.512 | 0.569 | 0.109 | 0.094 | 0.988 |
|        | Male   | Female | 0.656 | 0.898 | 0.117 | 0.204 | 0.385 | 0.285 |
| PTA    | Female | Male   | 0.656 | 0.898 | 0.117 | 0.204 | 0.385 | 0.285 |
|        | Male   | Female | 0.614 | 0.415 | 0.925 | 0.800 | 0.533 | 0.269 |
|        | Female | Male   | 0.614 | 0.415 | 0.925 | 0.800 | 0.533 | 0.269 |

**Table S5.** P-values results of Blood flow between different genders.

| Vessels | Gender |        | Healthy     |             |             | DPN         |             |             |
|---------|--------|--------|-------------|-------------|-------------|-------------|-------------|-------------|
|         |        |        | Age group 1 | Age group 2 | Age group 3 | Age group 1 | Age group 2 | Age group 3 |
| FPPDA   | Male   | Female | 0.628       | 0.696       | 0.530       | 0.565       | 0.586       | 0.283       |
|         | Female | Male   | 0.628       | 0.696       | 0.530       | 0.565       | 0.586       | 0.283       |
| FiCPDA  | Male   | Female | 1.000       | 1.000       | 0.424       | 0.943       | 0.351       | 0.195       |
|         | Female | Male   | 1.000       | 1.000       | 0.424       | 0.943       | 0.351       | 0.195       |
| SCPDA   | Male   | Female | 0.714       | 1.000       | 0.279       | 0.689       | 0.459       | 0.707       |
|         | Female | Male   | 0.714       | 1.000       | 0.279       | 0.689       | 0.459       | 0.707       |
| TCPDA   | Male   | Female | 0.470       | 0.449       | 0.196       | 0.087       | 0.614       | 0.192       |
|         | Female | Male   | 0.470       | 0.449       | 0.196       | 0.087       | 0.614       | 0.192       |
| FoCPDA  | Male   | Female | 0.279       | 0.407       | 0.567       | 0.754       | 0.654       | 0.964       |

|     |        |        |       |       |       |       |       |       |
|-----|--------|--------|-------|-------|-------|-------|-------|-------|
| PTA | Female | Male   | 0.279 | 0.407 | 0.567 | 0.754 | 0.654 | 0.964 |
|     | Male   | Female | 0.850 | 0.641 | 0.236 | 0.627 | 0.346 | 0.617 |
|     | Female | Male   | 0.850 | 0.641 | 0.236 | 0.627 | 0.346 | 0.617 |

**Table S6.** P-values results of blood flow velocity in three different age groups.

| Age group | Compared age group | FPPDA   |        |       |        | FiCPDA  |        |       |        |
|-----------|--------------------|---------|--------|-------|--------|---------|--------|-------|--------|
|           |                    | Healthy |        | DPN   |        | Healthy |        | DPN   |        |
|           |                    | Male    | Female | Male  | Female | Male    | Female | Male  | Female |
| 1         | 2                  | 0.486   | 1.000  | 0.487 | 1.000  | 0.872   | 1.000  | 1.000 | 1.000  |
|           | 3                  | 0.057   | 0.353  | 1.000 | 1.000  | 0.183   | 0.312  | 0.722 | 1.000  |
| 2         | 1                  | 0.486   | 1.000  | 0.487 | 1.000  | 0.872   | 1.000  | 1.000 | 1.000  |
|           | 3                  | 0.898   | 0.130  | 1.000 | 1.000  | 1.000   | 0.402  | 0.816 | 1.000  |
| 3         | 1                  | 0.057   | 0.353  | 1.000 | 1.000  | 0.183   | 0.312  | 0.722 | 1.000  |
|           | 2                  | 0.898   | 0.130  | 1.000 | 1.000  | 1.000   | 0.402  | 0.816 | 1.000  |
| Age group | Compared age group | SCPDA   |        |       |        | TCPDA   |        |       |        |
|           |                    | Healthy |        | DPN   |        | Healthy |        | DPN   |        |
|           |                    | Male    | Female | Male  | Female | Male    | Female | Male  | Female |
| 1         | 2                  | 0.335   | 1.000  | 1.000 | 0.291  | 1.000   | 1.000  | 1.000 | 1.000  |
|           | 3                  | 1.000   | 1.000  | 0.957 | 1.000  | 0.429   | 0.170  | 1.000 | 0.628  |
| 2         | 1                  | 0.335   | 1.000  | 1.000 | 0.291  | 1.000   | 1.000  | 1.000 | 1.000  |
|           | 3                  | 0.198   | 1.000  | 1.000 | 0.339  | 0.377   | 0.628  | 1.000 | 1.000  |
| 3         | 1                  | 1.000   | 1.000  | 0.957 | 1.000  | 0.429   | 0.170  | 1.000 | 0.628  |
|           | 2                  | 0.198   | 1.000  | 1.000 | 0.339  | 0.377   | 0.628  | 1.000 | 1.000  |
| Age       | Compared           | FoCPDA  |        |       |        | PTA     |        |       |        |

| group | age group | Healthy |        | DPN   |        | Healthy |        | DPN   |        |
|-------|-----------|---------|--------|-------|--------|---------|--------|-------|--------|
|       |           | Male    | Female | Male  | Female | Male    | Female | Male  | Female |
| 1     | 2         | 1.000   | 1.000  | 1.000 | 1.000  | 1.000   | 0.926  | 0.862 | 1.000  |
|       | 3         | 0.332   | 1.000  | 1.000 | 1.000  | 0.587   | 0.236  | 1.000 | 0.275  |
| 2     | 1         | 1.000   | 1.000  | 1.000 | 1.000  | 1.000   | 0.926  | 0.862 | 1.000  |
|       | 3         | 0.657   | 1.000  | 0.561 | 1.000  | 1.000   | 0.024  | 1.000 | 0.487  |
| 3     | 1         | 0.332   | 1.000  | 1.000 | 1.000  | 0.587   | 0.236  | 1.000 | 0.275  |
|       | 2         | 0.657   | 1.000  | 0.561 | 1.000  | 1.000   | 0.024  | 1.000 | 0.487  |

**Table S7.** *P*-values results of blood flow in three different age groups.

| Age group | Compared age group | FPPDA   |        |       |        | FiCPDA  |        |       |        |
|-----------|--------------------|---------|--------|-------|--------|---------|--------|-------|--------|
|           |                    | Healthy |        | DPN   |        | Healthy |        | DPN   |        |
|           |                    | Male    | Female | Male  | Female | Male    | Female | Male  | Female |
| 1         | 2                  | 1.000   | 1.000  | 1.000 | 1.000  | 1.000   | 1.000  | 1.000 | 0.912  |
|           | 3                  | 1.000   | 0.735  | 1.000 | 0.080  | 1.000   | 1.000  | 1.000 | 1.000  |
| 2         | 1                  | 1.000   | 1.000  | 1.000 | 1.000  | 1.000   | 1.000  | 1.000 | 0.912  |
|           | 3                  | 1.000   | 0.735  | 1.000 | 0.488  | 1.000   | 0.404  | 0.997 | 1.000  |
| 3         | 1                  | 1.000   | 0.735  | 1.000 | 0.080  | 1.000   | 1.000  | 1.000 | 1.000  |
|           | 2                  | 1.000   | 0.735  | 1.000 | 0.488  | 1.000   | 0.404  | 0.997 | 1.000  |

  

| Age group | Compared age group | SCPDA   |        |       |        | TCPDA   |        |       |        |
|-----------|--------------------|---------|--------|-------|--------|---------|--------|-------|--------|
|           |                    | Healthy |        | DPN   |        | Healthy |        | DPN   |        |
|           |                    | Male    | Female | Male  | Female | Male    | Female | Male  | Female |
| 1         | 2                  | 1.000   | 1.000  | 1.000 | 0.502  | 0.819   | 1.000  | 1.000 | 1.000  |
|           | 3                  | 1.000   | 0.355  | 1.000 | 0.293  | 0.819   | 1.000  | 1.000 | 1.000  |
| 2         | 1                  | 1.000   | 1.000  | 1.000 | 0.502  | 0.819   | 1.000  | 1.000 | 1.000  |

|           |                    |         |        |       |        |         |        |       |        |
|-----------|--------------------|---------|--------|-------|--------|---------|--------|-------|--------|
|           | 3                  | 1.000   | 0.355  | 1.000 | 1.000  | 0.101   | 1.000  | 1.000 | 1.000  |
| 3         | 1                  | 1.000   | 0.355  | 1.000 | 0.293  | 0.819   | 1.000  | 1.000 | 1.000  |
|           | 2                  | 1.000   | 0.355  | 1.000 | 1.000  | 0.101   | 1.000  | 1.000 | 1.000  |
|           |                    | FoCPDA  |        |       |        | PTA     |        |       |        |
| Age group | Compared age group | Healthy |        | DPN   |        | Healthy |        | DPN   |        |
|           |                    | Male    | Female | Male  | Female | Male    | Female | Male  | Female |
| 1         | 2                  | 1.000   | 0.290  | 1.000 | 1.000  | 0.816   | 0.162  | 0.845 | 1.000  |
|           | 3                  | 1.000   | 1.000  | 1.000 | 1.000  | 1.000   | 1.000  | 1.000 | 0.443  |
| 2         | 1                  | 1.000   | 0.290  | 1.000 | 1.000  | 0.816   | 0.162  | 0.845 | 1.000  |
|           | 3                  | 1.000   | 0.146  | 1.000 | 1.000  | 0.312   | 0.712  | 1.000 | 0.717  |
| 3         | 1                  | 1.000   | 1.000  | 1.000 | 1.000  | 1.000   | 1.000  | 1.000 | 0.443  |
|           | 2                  | 1.000   | 0.146  | 1.000 | 1.000  | 0.312   | 0.712  | 1.000 | 0.717  |
